# Supplementary material
Source: publisher figshare collection journal article supplement (https://acs.figshare.com/ndownloader/files/3734914)
Supplement: Supplementary file 1 [file 3734914]

Supporting Information for:

**Electronic Excitations in Solution:  
The Interplay between State Specific Approaches and a TD-DFT  
Description.**

Ciro A. Guido, Denis Jacquemin, Carlo Adamo and Benedetta Mennucci.

Figure S1. HOMO and LUMO involved in the  $\pi$ - $\pi^*$  excitation of the BODIPY system for the 0% and 90% of exact exchange coupled to the parent GGA functional PBE.

Figure S2. SCF energy difference between the first and the last cycle of iterations in the IBSF scheme for BODIPY system, in function of the EXX percentage included.

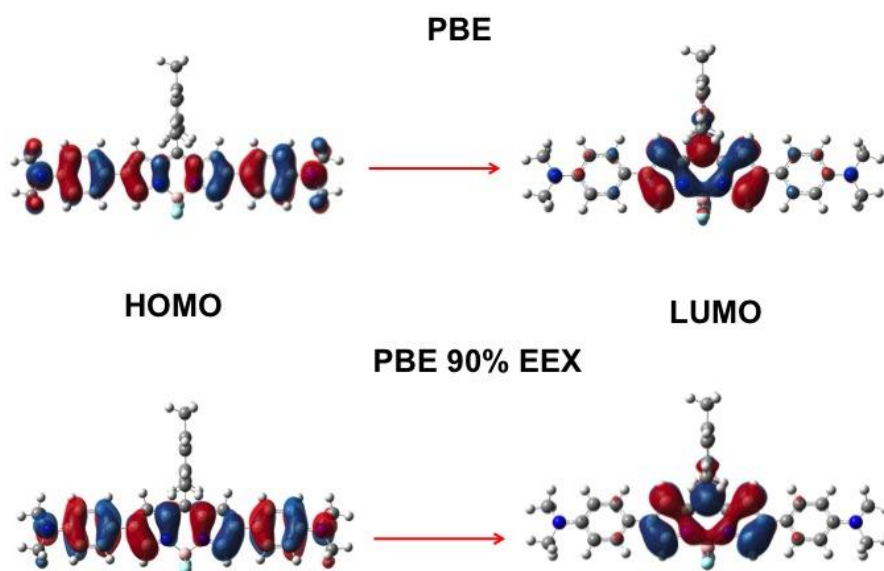

Figure S1.

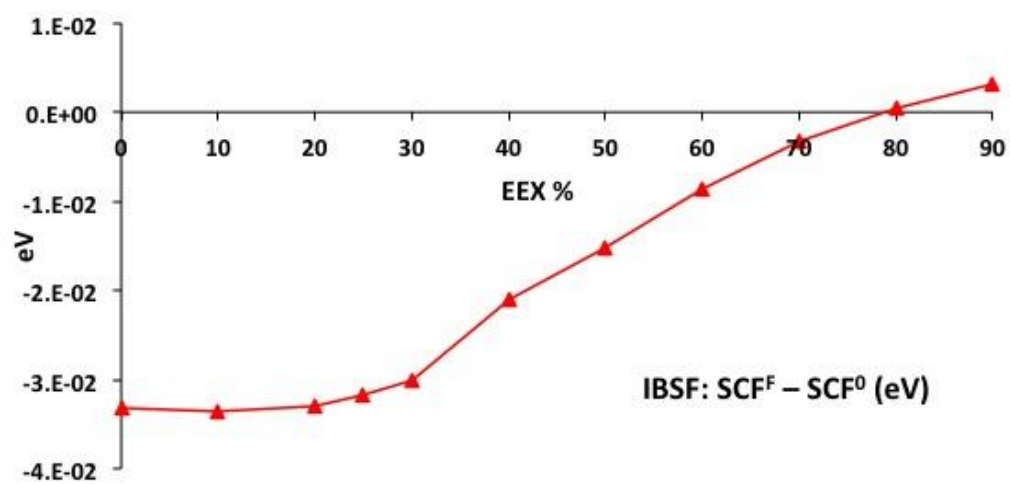

Figure S2.
